# Supplementary material for: MRCKα interacts with and mediates Na+, K+-ATPase-induced tight junction assembly in the lung epithelium
Source: JCI journal article supplement (doi:10.1172/jci.insight.134881), 2021-01-28

**Figure S1. Characterization of ATII to ATI cell differentiation.** (A) ATI cells were cultured on a 12-well transwell plate coated with 20 mg/ml fibronectin or PBS as control. TEER was measured every 24 hours after plating (n=4 for each group). (B) After day 4, cells were fixed and stained for occludin or zo-1 (red) and counterstained with DAPI (blue). Images were taken at 20x. (C) At day 3 after isolation when cells became confluent and displayed an ATI phenotype, 1  $\mu$ g/ml LPS was added and TEER was measured 24 hours later. (D) Following measurement of TEER in C, permeability to 3kD FITC-dextran was assayed. \*p<0.05; \*\*p<0.01. (E). Transfection of the  $\beta$ 1 subunit also increases other tight junction proteins, including zo-2 and claudin-18. AT1 cells (n=3) were transfected with pCMV-EGFP or pCMV-GFP $\beta$ 1 plasmids and used for Western blots 24 hours later.

**Figure S2. The  $\beta$ 1 subunit mediated upregulation of tight junction proteins is ion-transport independent.** (A) ATI cells (day 3 after isolation) were transfected with plasmid expressing the mouse  $\beta$ 2 subunit or pCDNA3 empty plasmid as control. Cells were lysed for western blot analysis after 24 hours. (B) ATI cells (day 3 after isolation) were transfected with plasmid expressing the mouse  $\beta$ 3 subunit containing a DDK tag or pCDNA3 empty plasmid as control. Cells were lysed for western blot analysis after 24 hours.

**Figure S3. Dose-dependent induction of  $\beta$ 1 subunit gene expression using a Tet-on system.** (A) 16HBE14o- cells were cotransfected with pCMV-tet regulator plasmids and pTet3G-human  $\beta$ 1 subunit expressing plasmids by electroporation, followed immediately by addition of 0, 1, 10, 100, and 1000 ng/ml doxycycline. Cells were lysed for western blot analysis 24 hours after electroporation. (B) 16HBE14o- cells were cotransfected with pCMV-tet plasmids and tet-

luciferase plasmids by electroporation. After transfection, cells were treated with 1  $\mu\text{g/ml}$  doxycycline or  $\text{H}_2\text{O}$  as control. Wells of cells ( $n=3$ ) were lysed with reporter lysis buffer every other day and luminescence was measured. RLU: relative luminescence unit. (C) qPCR for *SPC* and *CAVI* shows that dox treatment does not affect the differentiation from ATII to ATI.

**Figure S4. Identifying MRCK $\alpha$  as an interacting protein with the  $\beta$ 1 subunit.** (A) SDS-PAGE of immunoprecipitation using antibody against the  $\beta$ 1 subunit or GFP antibody as control (B) Amino acid coverage of MRCK $\alpha$ . Peptides identified by mass spectrometry are marked in red.

**Figure S5. Decreased MRCK $\alpha$  level in lung sections from human ARDS patients.** (A). Staining of MRCK $\alpha$  from sections of 3 normal control donors and 6 ARDS patients. Three random fields were chosen for each patient for intensity quantitation. Images from ARDS patient #5 were excluded from analysis due to high background signal. (B) Representative staining of MRCK $\alpha$  in the airways of control donor and ARDS patient.

**Table S1.** Number of proteins identified from triplicate MS experiment

| Repeat | Control | $\beta$ 1 |
|--------|---------|-----------|
| 1      | 1253    | 1322      |
| 2      | 1081    | 1204      |
| 3      | 1325    | 1581      |

Figure S1

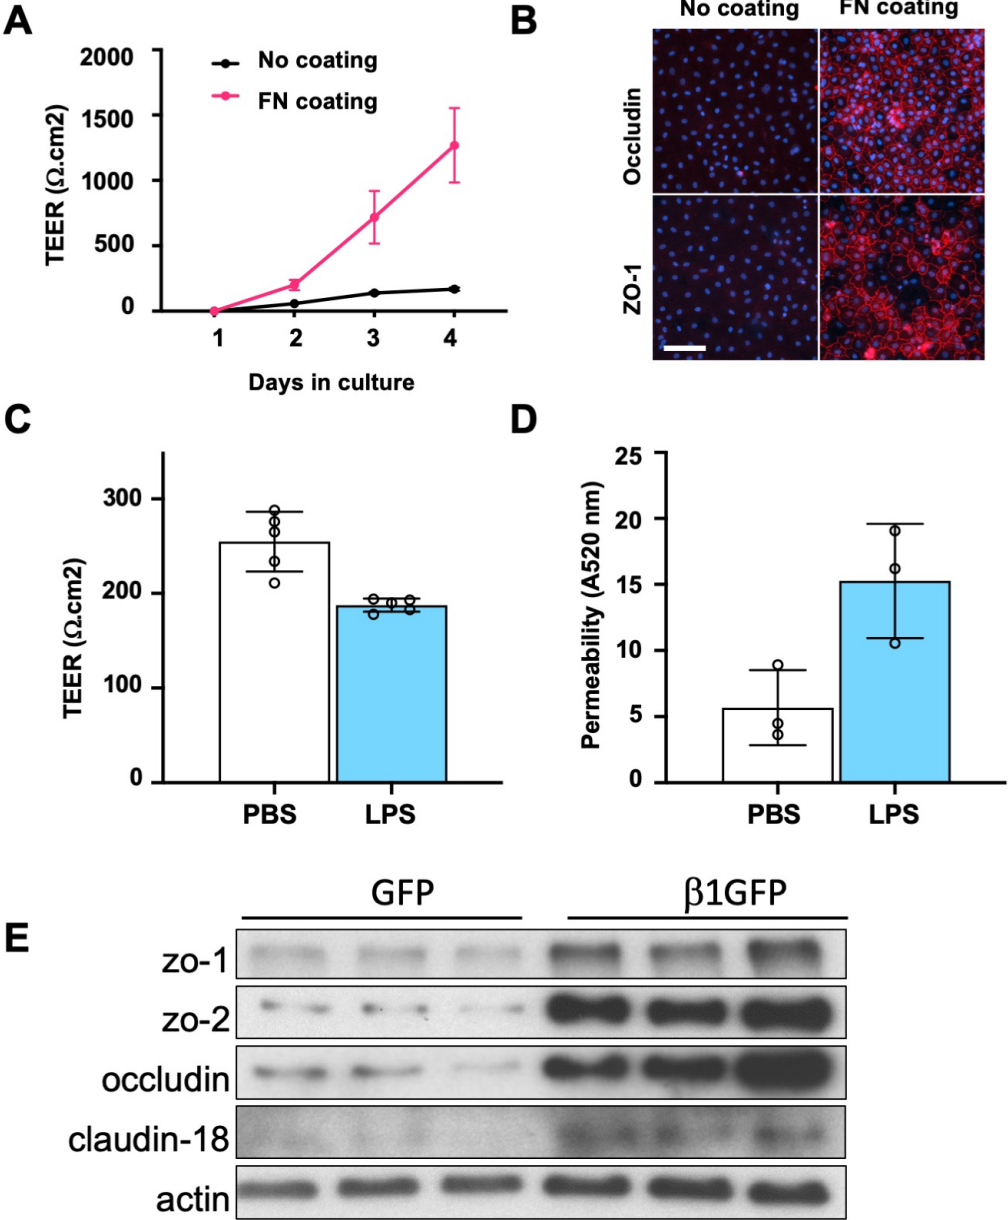

**Figure S2**

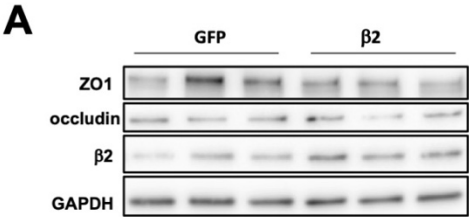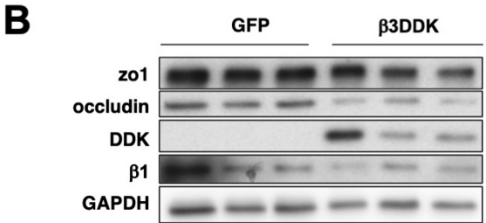

# Figure S3

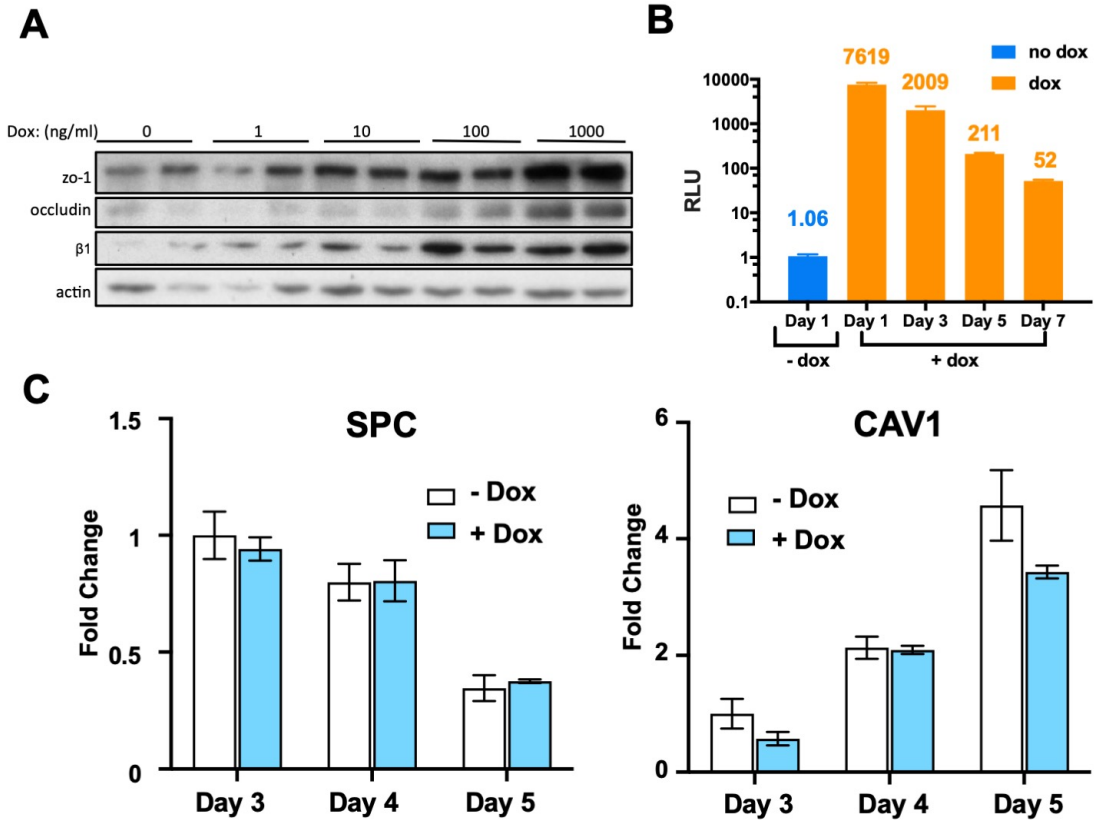



# Figure S4

**A**

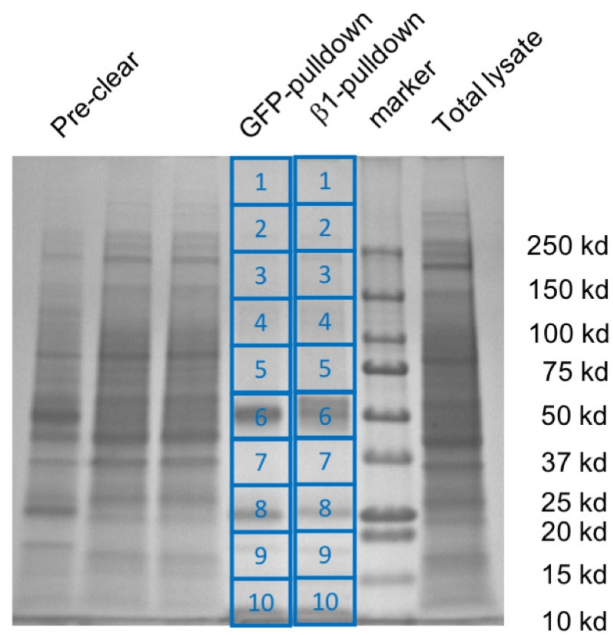

**B**

```

1  MSGEVRLRQL EQFILDGPAQ TNGQCFSVET LLDILICLYD ECNNSPLRRE KNILEYLEWA KPFTSKVKQM RLHREDFEIL
81  KVIGRGAFGE VAVVKLNAD KVFAMKILNK WEMLKRAETA CFREERDVLV NGDNKWITTL HYAFQDDNNL YLVMDDYVGG
161  DLTLLSKFE DRLPEDMARF YLAEMVIAID SVHQLHYVHR DIKPDNILMD MNGHIRLADF GSCLKMEDG TVQSSVAVGT
241  PDYISPEILQ AMEDGKGRYG PECDWWSLGV CMYEMLYGET PFYAESLVET YGKIMNHKER FQFPAQVTDV SENAKDLIRR
321  LICSREHRLG QNGIEDFKKH PFVSGIDWDN IRNCEAPYIP EVSSPTDTSN FDVDDCLKN SETMPPPTHT AFSGHHLFPV
401  GFTYTSSCVL SDRSCLRUTA GPTSLDLVDN VQRTLDNNLA TEAYERRIKR LEQEKLELSR KLQESTQTQV ALQYSTVDGP
481  LTASKDLEIK NLKEEIEKLR QVTESSHLE QQLEEANAVR QELDDAFRQI KAYEKQIKTL QQEREDLNKE LVQASERLKN
561  QSKEKDAHC QRKLAHQEFM EINERLTELH TQKQKLARHV RDKEEEVDLV MQKVESLRQE LRRTERAKKE LEVHTEALAA
641  EASKDRKLRE QSEHYSKQLE NELEGLKQKQ ISYSPGVCSI EHQQEITKLK TDLEKKSIFY EEELSKREGI HANEIKNLKK
721  ELHDSEQQL ALNKEIMILK DKLEKTRRES QSEREFESE FKQQYEREKV LLTEENKLT SELDKLTTLY ENLSIHNQQL
801  EEEVKDLADK KESVAHWAEQ ITEIIQWVSD EKDARGYLQA LASKMTEELE ALRNSSLGTR ATDMPWKMR FAKLDMSARL
881  ELQSALDAEI RAKQAIQEEL NKVKASNIIT ECKLKDSEKK NLELLSEIEQ LIKDTEELRS EKGIEHQDSQ HSFLAPLNTP
961  TDALDQFERS PSCTPASKGR RTVDSTPLSV HTPTLRKKGC PGSTGFPPKR KTHQFFVKSF TPPTKCHQCT SLMVGLIRQG
1041 CSCEVCGFSC HITCVNKAPT TCPVPPEQTK GPLGIDPQKG IGTAYEGHVR IPKPAGVKKG WQRALAIVC FKLFLYDIAE
1121 GKASQPSVVI SQVIDMRDEE FSVSSVLASD VIHASRKDIP CIFRVTASQL SASNNKCSIL MLADTENEKN KWVGVLSEH
1201 KILKKNKFRD RSVYVPKEAY DSTLPLIKTT QAAAIDHER IALGNEEGLF VVHVTKDEII RVGDNKKIHQ IELIPNDQLV
1281 AVISGRNRHV RLFPMSALDG RETDYKLSE TKGCQVTSG KVRHGALTCL CVAMKRQVLC YELFQSKTRH RKFKEIQVPY
1361 NVQWMAIFSE QLCVGFQSGF LRYPLNGEGN PYSMLNSNDH TLSFIAHQPM DAICAVEISS KEYLLCFNSI GIYDTCQGRR
1441 SRQQELMWPA NPSSCCYNAP YLSVYSENAV DIFDVNSMEW IQTLPLKKVR PLNNEGSLNL LGLETIRLIY FNKMAEGDE
1521 LVPVPETSDNS RKQMVRNINN KRRYSFRVPE EERMQORREM LRDPEMNRNL ISNPTFNHI AHMPGDGIQ ILKDLPMNPR
1601 PQESRTVFSG SVSIPSITKS RPEPGRMSA SSGLSARSSA QNSSALKREF SGGSYSAKRQ PMPSPSEGL SSGMDQGSD
1681 APARDFDGED SDSPRHSTAS NSSNLSSPPS PASPRKTKSL SLESTRGSW DP

```





# Figure S5

## A

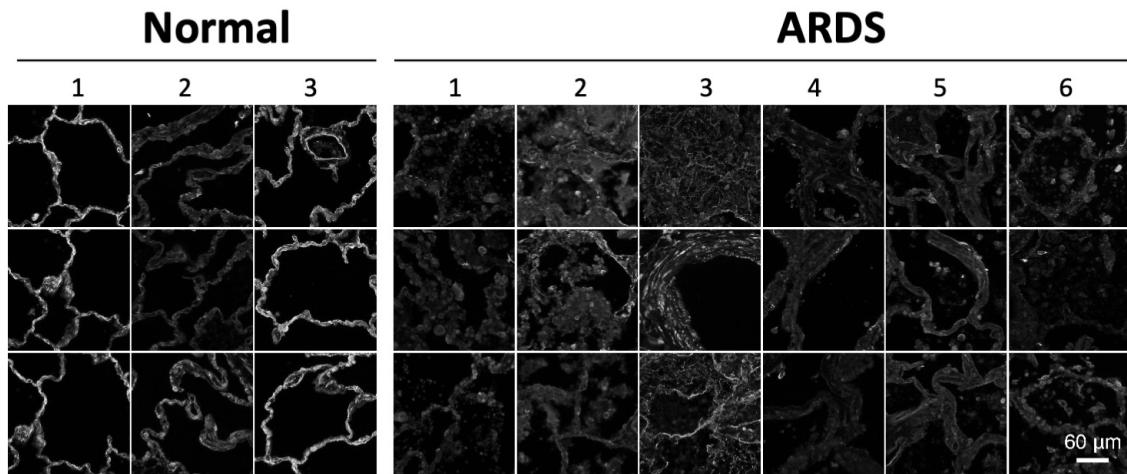

## B

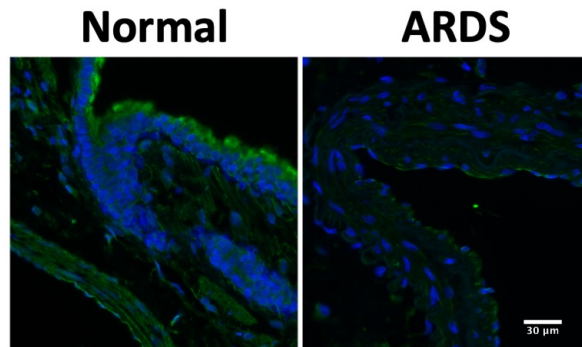

Supplement: sd1 [file 1]
